# Supplementary material for: Promoting respectful maternity care: challenges and prospects from the perspectives of midwives at a tertiary health facility in Ghana
Source: Springer Nature journal article supplement (doi:10.1186/s12884-022-04786-w), 2022-05-31
Supplement: MOESM2 [file 23112520]

## Respectful Maternity Care Interview Protocol Midwives

Interviewer introduction note: My name is.....

### Demographic details:

1. Age:
2. Education qualification:
3. Years of experience:
4. Parity status:
5. Married: A: Never married

B: Currently married

C: Previously Married

|                                                                                                                                                              |                                                                                                                                                                                                                                                                                                                                                                                                                                       |                                                                                                                                     |                                                                                                                                                                     |
|--------------------------------------------------------------------------------------------------------------------------------------------------------------|---------------------------------------------------------------------------------------------------------------------------------------------------------------------------------------------------------------------------------------------------------------------------------------------------------------------------------------------------------------------------------------------------------------------------------------|-------------------------------------------------------------------------------------------------------------------------------------|---------------------------------------------------------------------------------------------------------------------------------------------------------------------|
|                                                                                                                                                              | <p><i>Challenges you encountered in the past in performing this duty/challenges you foresee encountering (what is likely to prevent you from performing this duty).</i></p> <p><i>Challenges can be under the following themes: challenge due to clients' conditions (attitudes, age, neatness of appearance, etc.), institutional physical and policy environment, and provider conditions (attitudes, beliefs, values, etc)</i></p> | <p><i>What provisions or assistance do you think, when made available, will empower you to discharge this duty effectively.</i></p> | <p><i>What are your reservations on this duty? State specific suggestions or alternatives. [If none, ask interviewee to give a general remark on the duty.]</i></p> |
| <b>Emotional support</b>                                                                                                                                     |                                                                                                                                                                                                                                                                                                                                                                                                                                       |                                                                                                                                     |                                                                                                                                                                     |
| Childbearing women may have many thoughts, including those of fears and anxiety. So, you should reassure them of how safe the childbirth process is. Massage |                                                                                                                                                                                                                                                                                                                                                                                                                                       |                                                                                                                                     |                                                                                                                                                                     |

|                                                                                                                                                                                                                                                |  |  |  |
|------------------------------------------------------------------------------------------------------------------------------------------------------------------------------------------------------------------------------------------------|--|--|--|
| <p>the woman in a comforting manner and talk to her to alleviate fears.<br/>[probes: we should ask real world examples here to probe]</p>                                                                                                      |  |  |  |
| <p>Allow birth companions during labour and delivery/postpartum.<br/>[probes: what of the VIP ward—cost etc]</p>                                                                                                                               |  |  |  |
| <p>Timely response/action to clients' needs when required for support in labour or postpartum.<br/>[probes: we should ask real world examples here to probe]</p>                                                                               |  |  |  |
|                                                                                                                                                                                                                                                |  |  |  |
| <p><b>Respectful communication</b></p>                                                                                                                                                                                                         |  |  |  |
| <p>Introduce yourself as a caregiver, ask of the woman's name and address her by name, ask about her needs or questions, and attentively listen to the concern of the woman.<br/>[probes: we should ask real world examples here to probe]</p> |  |  |  |
| <p>Explain ward operations to clients and their relatives in a respectful tone.<br/>[probes: we should ask real world examples here to probe]</p>                                                                                              |  |  |  |
| <p>Explain care procedures clearly and obtain consent from the woman/family before performing any.<br/>[probes: we should ask real world examples here to probe]</p>                                                                           |  |  |  |
| <p>Taking woman's medical records without the presence of family members and other childbearing women. [probes: confidentiality—we should ask real world examples here to probe]</p>                                                           |  |  |  |

|                                                                                                                                                                                                                           |  |  |  |
|---------------------------------------------------------------------------------------------------------------------------------------------------------------------------------------------------------------------------|--|--|--|
| <p>Seek and obtain consent from woman before disclosing her medical records to family members.<br/>[probes: we should ask real world examples here to probe]</p>                                                          |  |  |  |
|                                                                                                                                                                                                                           |  |  |  |
| <p><b>Respectful and dignified care</b></p>                                                                                                                                                                               |  |  |  |
| <p>Draping woman before and after vaginal examination.<br/>[probes: we should ask real world examples here to probe]</p>                                                                                                  |  |  |  |
| <p>Not pinching in-between the thighs or beating or slapping the woman regardless of the provocation from her to get her to do what you want her to do.<br/>[probes: we should ask real world examples here to probe]</p> |  |  |  |
| <p>Not tying (no use of physical restrains) women with straps on the delivery bed before performing examinations.<br/>[probes: we should ask real world examples here to probe]</p>                                       |  |  |  |
| <p>Guiding the woman to deliver in the position of her choosing.<br/>[probes: we should ask real world examples here to probe]</p>                                                                                        |  |  |  |
| <p>Assist and allow the woman to move freely in the labour ward.<br/>[probes: we should ask real world examples here to probe]</p>                                                                                        |  |  |  |
| <p>Using curtain/screens to separate woman from others before uncovering them to perform examinations/giving injections.<br/>[probes: we should ask real world examples here to probe]</p>                                |  |  |  |

|                                                                                                                                                               |  |  |  |
|---------------------------------------------------------------------------------------------------------------------------------------------------------------|--|--|--|
| Not detaining the woman in facility due to lack of payment of facility fees or any other reason.<br>[probes: we should ask real world examples here to probe] |  |  |  |
|                                                                                                                                                               |  |  |  |
